# Supplementary material for: Icaritin Preparation from Icariin by a Special Epimedium Flavonoid-Glycosidase from Aspergillus sp.y848 Strain
Source: PubMed Central journal article supplement (PMC9628809; doi:10.4014/jmb.2112.12036), 2022-02-11
Supplement: jmb-32-4-437-supple.pdf [file jmb-32-4-437-supple.pdf]

## Supplementary Files

### Icaritin Preparation from Icariin by a Special *Epimedium* Flavonoid-Glycosidase from *Aspergillus* sp.y848 Strain

\* Corresponding author *E-mail addresses*: [hongshan@dlpu.edu.cn](mailto:hongshan@dlpu.edu.cn) (H. Yu), [cksun110@vip.sina.com](mailto:cksun110@vip.sina.com) (C. Sun), [fxjin@dlpu.edu.cn](mailto:fxjin@dlpu.edu.cn) (F. Jin).

**Fig. S1.** Effect of enzyme inducer (*Epimedium* leaf powder) on enzyme production.

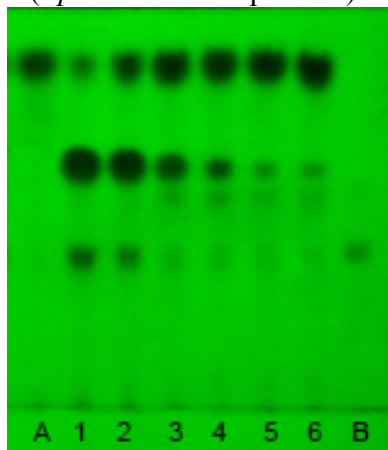

A, Icaririn; B, Icariin. 1, 0.2% *Epimedium* leaf powder ; 2, 0.4% *Epimedium* leaf powder ; 3, 0.5% *Epimedium* leaf powder ; 4, 0.7% *Epimedium* leaf powder; 5, 0.7% *Epimedium* leaf powder ; 6, 0.8% and 1% (w/v) *Epimedium* leaf powder. The 0.25% icariin was reacted by enzyme at 40 °C for 12 h. Developing solvent, ethyl acetate: butanone: methanol: water = 8: 7: 1: 1 (v/v/v/v); rendering colour in 280 nm ultraviolet.

The optimal enzyme inducer concentration was 0.7% *Epimedium* leaf powder.

**Fig. S2.** The fractions from DEAE-cellulose column in SDS-PAGE.

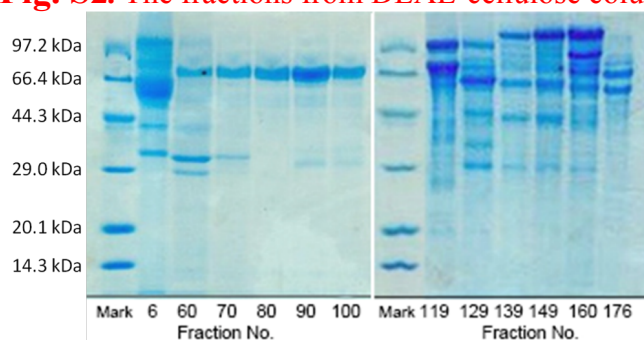

Mark, marker proteins including phosphatase b (97.4 kDa), bovine serum albumin (66.2 kDa), actin (43 kDa), carbonic anhydrase (31 kDa), trypsin inhibitor (22 kDa) and lysozyme (14.4 kDa).

**Fig. S3.** The enzyme molecular weight was calculated according to the mobility of marker proteins basing on plotting the log of the marker protein molecular weight [30] as shown in Fig. S2.

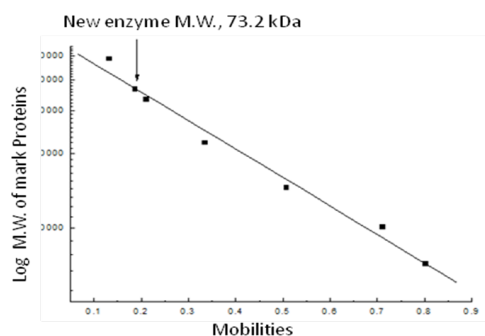

**Fig. S4.** Lineweaver–Burk plot of *Epimedium* flavonoid-glycosidase on the conversion of icariin. The  $K_m$  and  $V_{max}$  for icariin were 15.63 mM, and 55.56 mM/h; the enzyme reaction velocities ( $V_o$ ) in 5 mM substrate were 13.5 mM/h..

The Michaelis constant ( $K_m$ ) and the maximal reaction velocity ( $V_{max}$ ) for *Epimedium* flavonoid-glycosidase from *Aspergillus* sp.y848 strain were measured with fully mixed icariin at concentrations of 12.5, 15.4, 20.0, 28.6, and 50.0 mM in 0.02 M acetate buffer (pH 5.0). The reaction was performed at 40 °C and pH 5.0 for 0.5, 1.0, 1.5, 2.0 and 3.0 h, respectively. The conversion velocities of icariin or epimedin A or epimedin B or epimedin C were obtained according to the TLC spot ratio of substrates and products in the enzyme reactions, respectively. The  $K_m$  and  $V_{max}$  were calculated by the Lineweaver–Burk plots [32]. According to  $K_m$  and  $V_{max}$ , the conversion velocity  $V_o$  of icariin or epimedin A or epimedin B or epimedin C at a given substrate concentration was calculated using the Michaelis–Menten equation (1) [27-29]:

$$V = \frac{V_{max} \cdot [S]}{K_m + [S]} \quad (1)$$

In the equation;  $[S]$  is the substrate concentration (mM),  $V$  is the velocity (mM/h),  $K_m$  is the Michaelis constant (mM),  $V_{max}$  is the maximum velocity (mM/h).  $V_o$  (mM/h) is the conversion velocity at a given substrate concentration.

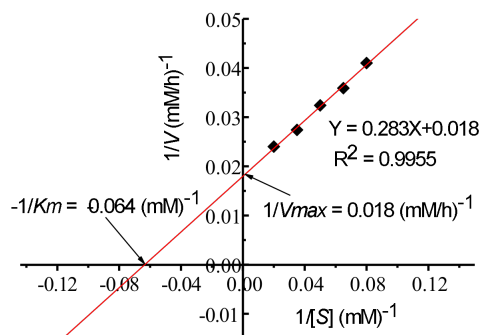

**Table S1.**

Effect of metallic ions on purified *Epimedium* flavonoid-glycosidase activity fo icariin (Relative activity %).

| Concentration (mM/L) | Na <sup>+</sup> | K <sup>+</sup> | Mg <sup>2+</sup> | Ca <sup>2+</sup> | Zn <sup>2+</sup> | Fe <sup>3+</sup> | Cu <sup>2+</sup> |
|----------------------|-----------------|----------------|------------------|------------------|------------------|------------------|------------------|
| 0                    | 100             | 100            | 100              | 100              | 100              | 100              | 100              |
| 5                    | 99.5            | 99.6           | 110              | 106              | 109              | 20.1             | 60.1             |
| 10                   | 105             | 104            | 116              | 108              | 90,1             | 5.05             | 45.0             |
| 50                   | 98.5            | 99.8           | 114              | 105              | 60.0             | 0                | 10.1             |
| 100                  | 107             | 101            | 109              | 103              | 49.0             | 0                | 0                |
| 200                  | 102             | 102            | 106              | 102              | 5.0              | 0                | 0                |

## Fig. S5. Additional information of spectra for enzymatic product icaritin analyzing by NMR

The structure of enzymatic product icaritin from icariin or *Epimedium*-flavonoids consisting of icariin, epimedin A and epimedin B and epimedin C was analyzed using NMR. The product was dissolved in Pyridine-*d*<sub>5</sub>, and the NMR spectra were recorded by using the Bruke Avance 600 NMR spectrometer (<sup>1</sup>H: 600 MHz; <sup>13</sup>C: 150 MHz) (Switzerland).

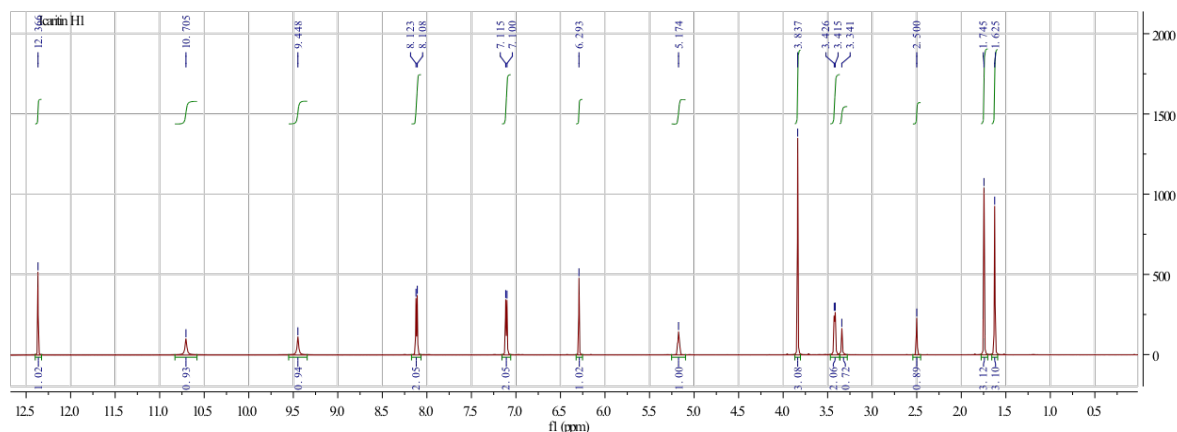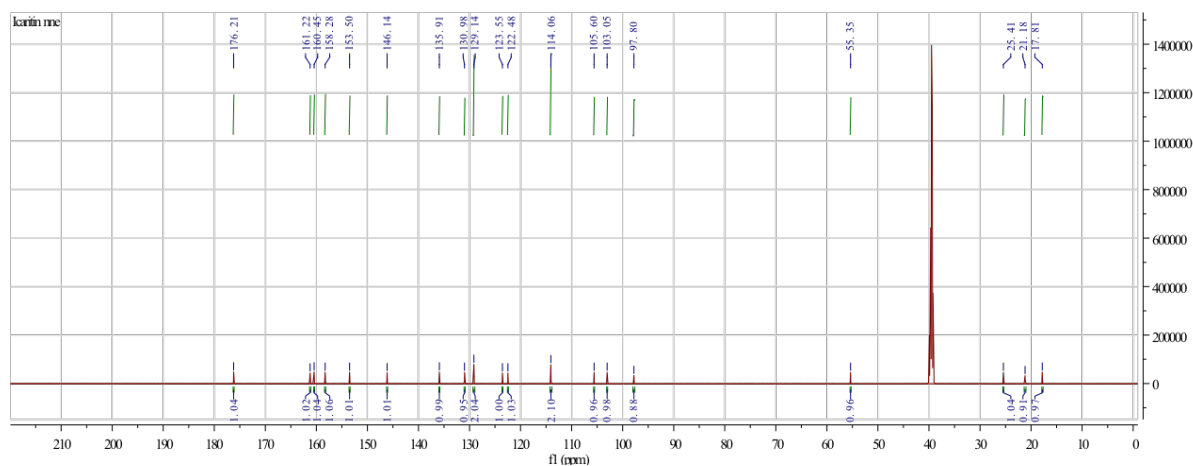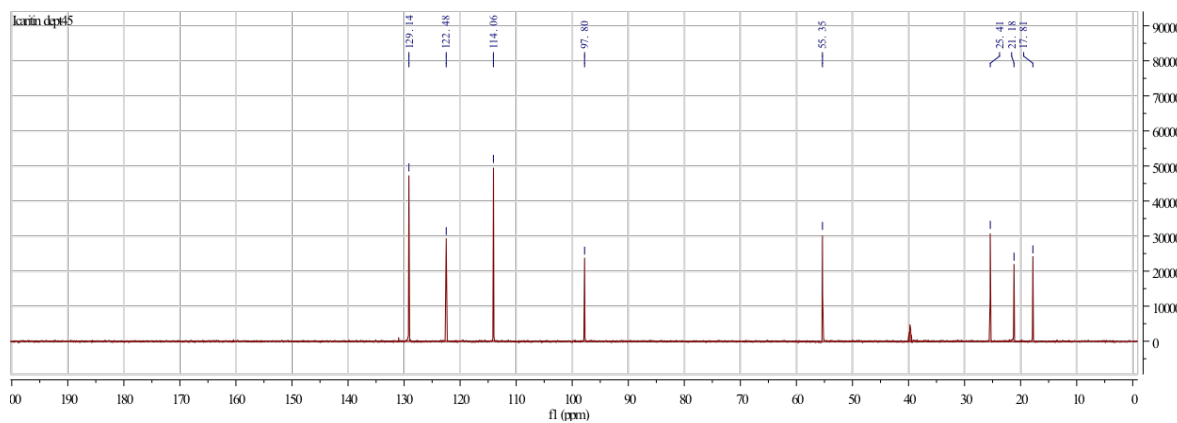

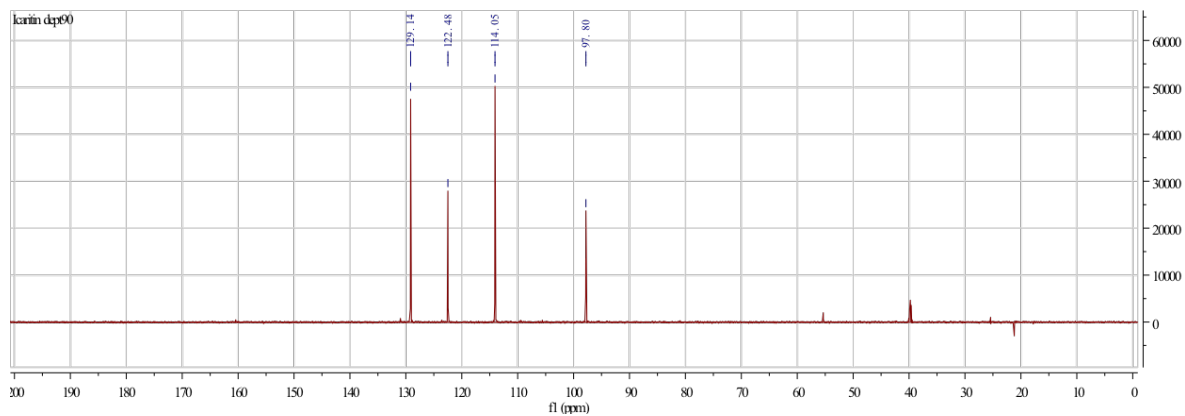

Fig. S5-4.  $^{13}\text{C}$  DEPT 90 NMR spectrum of icaritin

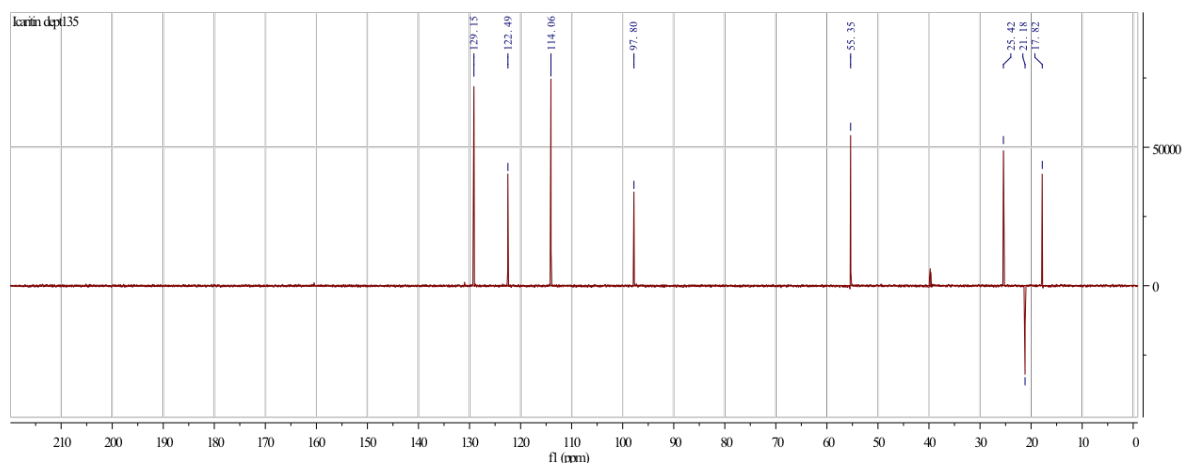

Fig. S5-5.  $^{13}\text{C}$  DEPT 9135 NMR spectrum of icaritin

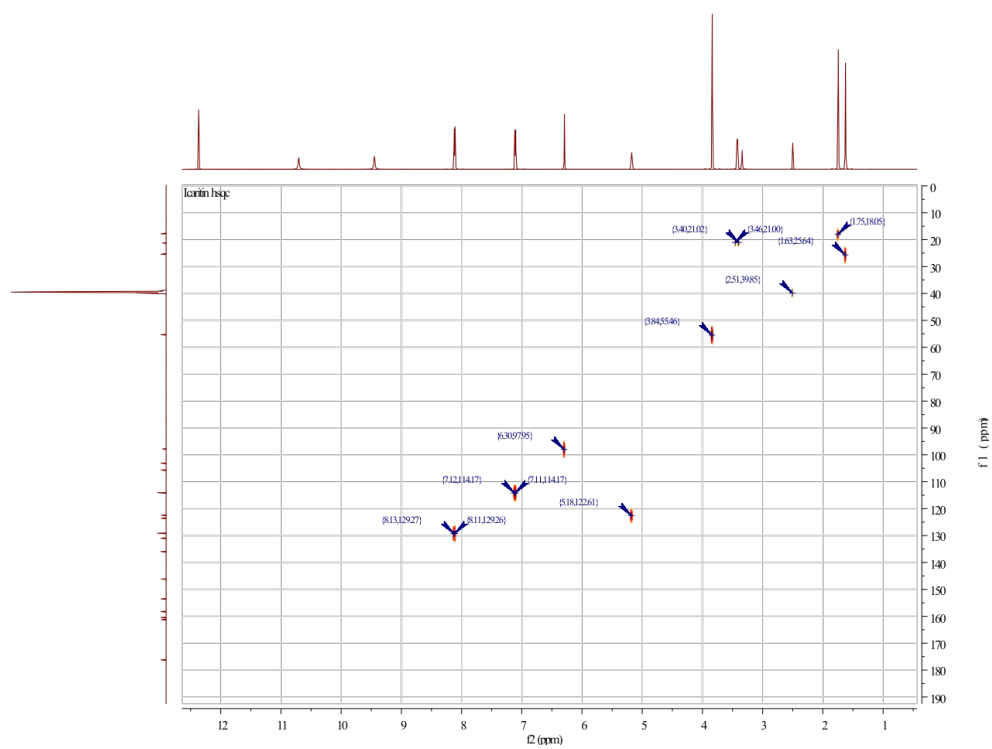

Fig. S5-6.  $^1\text{H}$ - $^{13}\text{C}$  HSQC spectrum of icaritin

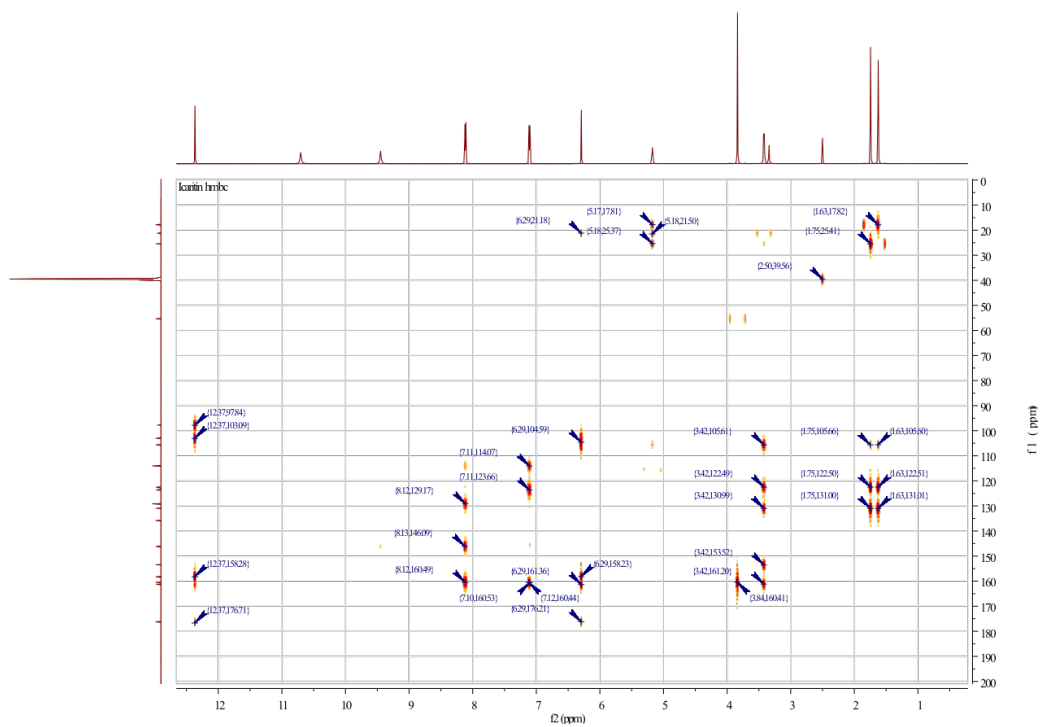

Fig. S5-7.  $^1\text{H}$ - $^{13}\text{C}$  HMBC spectrum of icaritin

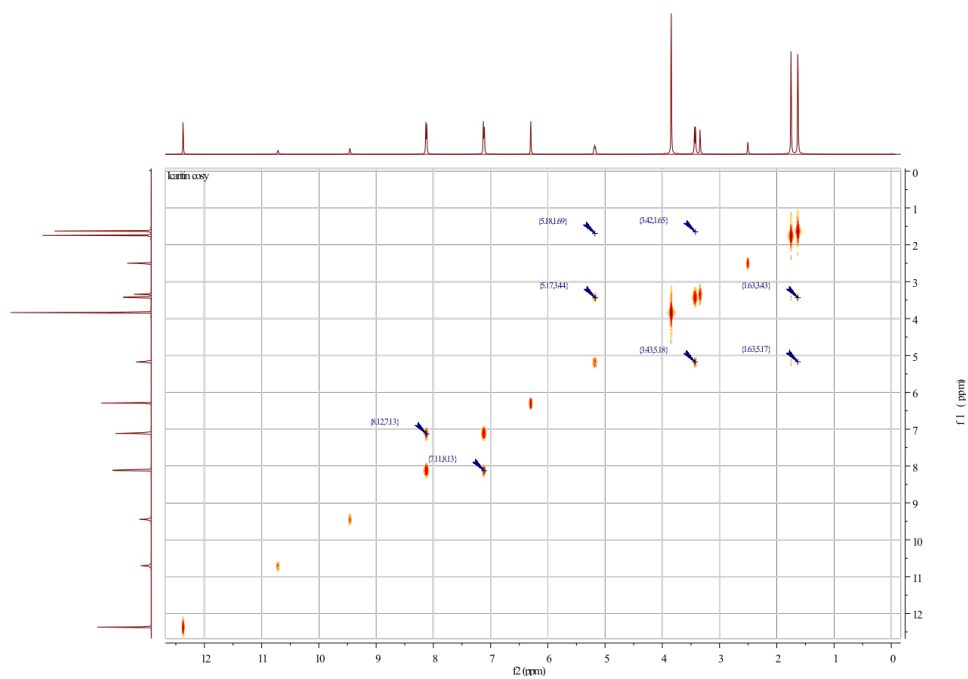

Fig. S5-8.  $^1\text{H}$ - $^1\text{H}$  COSY spectrum of icaritin
